# Supplementary material
Source: PubMed Central journal article supplement (PMC7446934)

## Supplemental Data

| Supplemental Table 1 CTC Changes Stratified by PSA Changes |                                                                        |                    |                    |                              |                    |
|------------------------------------------------------------|------------------------------------------------------------------------|--------------------|--------------------|------------------------------|--------------------|
| PSA Changes from Baseline at 6 Weeks After Treatment Given | CTC Changed From Baseline in the First 6 Weeks Post-treatment (n = 19) |                    |                    |                              |                    |
|                                                            | Decreased (n = 7)                                                      | No Change (n = 7)  | Increased (n = 5)  | Decreased/No Change (n = 14) | Increased (n = 5)  |
| Median, (range)                                            | -36% (-82% to 28%)                                                     | -52% (-98% to 31%) | -30% (-94% to 14%) | -51% (-98% to 31%)           | -30% (-94% to 14%) |
| P value                                                    |                                                                        | .79 <sup>a</sup>   |                    | .85 <sup>b</sup>             |                    |

Abbreviations: CTC = circulating tumor cells; PSA = prostate-specific antigen.

<sup>a</sup>P value based on Kruskal-Wallis test.

<sup>b</sup>P value based on Wilcoxon test.

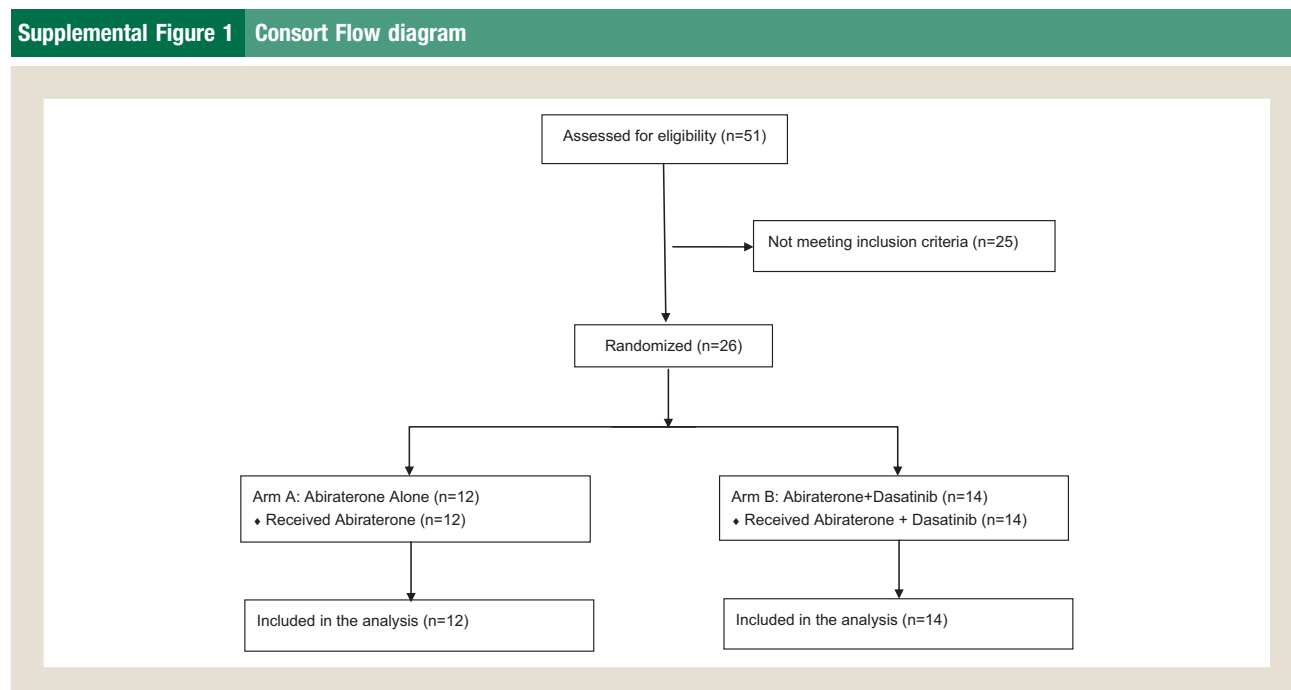

Supplement: NIHMS1615457-supplement-1.pdf [file NIHMS1615457-supplement-1.pdf]
